# Supplementary material
Source: PubMed Central journal article supplement (PMC9040182)
Supplement: mmc1.pdf [file mmc1.pdf]

## Supplemental information

### Development and validation of SCOPE score:

### A clinical score to predict COVID-19 pneumonia progression to severe respiratory failure

Evangelos J. Giamarellos-Bourboulis, Garyfallia Poulakou, Aline de Nooijer, Haralampos Milionis, Simeon Metallidis, Michalis Ploumidis, Pinelopi Grigoropoulou, Aggeliki Rapti, Francesco Vladimiro Segala, Evangelos Balis, Efthymia Giannitsioti, Paola Rodari, Ilias Kainis, Zoi Alexiou, Emanuele Focà, Brollo Lucio, Nikoletta Rovina, Laura Scorzolini, Maria Dafni, Sofia Ioannou, Alessandro Tomelleri, Katerina Dimakou, Glykeria Tzatzagou, Maria Chini, Matteo Bassetti, Christina Trakatelli, George Tsoukalas, Carlo Selmi, Charilaos Samaras, Maria Saridaki, Athina Pyrpasopoulou, Elisabeth Kaldara, Ilias Papanikolaou, Aikaterini Argyraki, Karolina Akinosoglou, Marina Koupetori, Periklis Panagopoulos, George N. Dalekos, and Mihai G. Netea

## SUPPLEMENTARY APPENDIX

### Development and validation of SCOPE score: a clinical score to predict progression of COVID-19 pneumonia to severe respiratory failure

**Running title:** SCOPE score for COVID-19 pneumonia

Evangelos J. Giamarellos-Bourboulis<sup>1,2</sup>, Garyfallia Poulakou<sup>3</sup>, Aline de Nooijer<sup>4</sup>, Haralampos Milionis<sup>5</sup>, Simeon Metallidis<sup>6</sup>, Michalis Ploumidis<sup>7</sup>, Pinelopi Grigoropoulou<sup>8</sup>, Aggeliki Rapti<sup>9</sup>, Francesco Vladimiro Segala<sup>10</sup>, Evangelos Balis<sup>11</sup>, Efthymia Giannitsioti<sup>12</sup>, Paola Rodari<sup>13</sup>, Ilias Kainis<sup>14</sup>, Zoi Alexiou<sup>15</sup>, Emanuele Focà<sup>16</sup>, Brollo Lucio<sup>17</sup>, Nikoletta Rovina<sup>18</sup>, Laura Scorzolini<sup>19</sup>, Maria Dafni<sup>20</sup>, Sofia Ioannou<sup>21</sup>, Alessandro Tomelleri<sup>22</sup>, Katerina Dimakou<sup>23</sup>, Glykeria Tzatzagou<sup>24</sup>, Maria Chini<sup>25</sup>, Matteo Bassetti<sup>26</sup>, Christina Traketelli<sup>27</sup>, George Tsoukalas<sup>28</sup>, Carlo Selmi<sup>29</sup>, Charilaos Samaras<sup>30</sup>, Maria Saridaki<sup>31</sup>, Athina Pырpasopoulou<sup>32</sup>, Elisabeth Kaldara<sup>33</sup>, Ilias Papanikolaou<sup>34</sup>, Aikaterini Argyraki<sup>35</sup>, Karolina Akinosoglou<sup>36</sup>, Marina Koupetori<sup>37</sup>, Periklis Panagopoulos<sup>38</sup>, George N. Dalekos<sup>39</sup>, Mihai G. Netea<sup>4,40</sup>

<sup>1</sup>4<sup>th</sup> Department of Internal Medicine, National and Kapodistrian University of Athens, Medical School, Athens, Greece;

<sup>2</sup>Hellenic Institute for the Study of Sepsis, Athens, Greece;

<sup>3</sup>3<sup>rd</sup> Department of Internal Medicine, National and Kapodistrian University of Athens, Medical School, Athens, Greece;

<sup>4</sup>Department of Internal Medicine and Center for Infectious Diseases, Radboud University, 6500 Nijmegen, The Netherlands;

<sup>5</sup>1<sup>st</sup> Department of Internal Medicine, University of Ioannina, Medical School, Ioannina, Greece;

<sup>6</sup>1<sup>st</sup> Department of Internal Medicine, Aristotle University of Thessaloniki, Medical School, Thessaloniki, Greece;

<sup>7</sup>1<sup>st</sup> Department of Internal Medicine, G. Gennimatas General Hospital of Athens, Athens, Greece;

<sup>8</sup>2<sup>nd</sup> Department of Pulmonary Medicine, Sotiria General Hospital of Chest Diseases, Athens, Greece;

<sup>9</sup>Department of Internal Medicine, Elpis General Hospital, Athens, Greece;

<sup>10</sup>Dipartimento Scienze di Laboratorio e Infettivologiche - Fondazione Policlinico Gemelli IRCCS, Roma Italy

<sup>11</sup>1<sup>st</sup> Department of Critical Care and Pulmonary Medicine, Medical School, National and Kapodistrian University of Athens, Evangelismos General Hospital, Athens, Greece;

<sup>12</sup>2<sup>nd</sup> Department of Internal Medicine, Tzaneio General Hospital of Piraeus, Athens, Greece;

<sup>13</sup>Department of Infectious – Tropical Diseases and Microbiology, IRCSS Sacro Cuore Hospital, Negrar, Verona, Italy;

<sup>14</sup>10<sup>th</sup> Department of Pulmonary Medicine, Sotiria General Hospital of Chest Diseases of Athens, Greece;

<sup>15</sup>2<sup>nd</sup> Department of Internal Medicine, Thriasio General Hospital of Eleusis, Athens, Greece;

<sup>16</sup>Spedali Civili, Brescia ASST Spedali Civili Hospital, University of Brescia, Italy;

<sup>17</sup>Department of Internal Medicine, Hospital of Jesolo, Italy;

<sup>18</sup>1<sup>st</sup> Department of Chest Medicine, National and Kapodistrian University of Athens, Medical School, Athens, Greece;

<sup>19</sup>Department of Internal Medicine, Spallanzani Institute of Rome, Italy;

<sup>20</sup>1<sup>st</sup> Department of Internal Medicine, Korgialeneion-Benakeion General Hospital, Athens, Greece;

<sup>21</sup>Department of Therapeutics, National and Kapodistrian University of Athens, Medical School, Athens, Greece;

<sup>22</sup>Unit of Immunology, Rheumatology, Allergy and Rare Diseases (UnIRAR), IRCCS Ospedale San Raffaele & Vita-Salute San Raffaele University, Milan, Italy;

<sup>23</sup>5<sup>th</sup> Department of Pulmonary Medicine, Sotiria General Hospital of Chest Diseases, Athens, Greece;

<sup>24</sup>1<sup>st</sup> Department of Internal Medicine, Papageorgiou General Hospital of Thessaloniki, Thessaloniki, Greece

<sup>24</sup>3<sup>rd</sup> Dpt of Internal Medicine and Infectious Diseases Unit, Korgialeneion-Benakeion General Hospital, Athens, Greece;

<sup>26</sup>Infectious Diseases Clinic, Ospedale Policlinico San Martino IRCCS and Department of Health Sciences, University of Genova, Genova, Italy;

<sup>27</sup>3<sup>rd</sup> Department of Internal Medicine, Aristotle University of Thessaloniki, Medical School, Thessaloniki, Greece;

<sup>28</sup>4<sup>th</sup> Department of Pulmonary Medicine, Sotiria General Hospital of Chest Diseases, Athens, Greece;

<sup>29</sup>Department of Biomedical Sciences, Humanitas University, 20072 Pieve Emanuele and IRCCS Humanitas Research Hospital, via Manzoni 56, 20089 Rozzano, Milan, Italy

<sup>30</sup>1<sup>st</sup> Department of Internal Medicine, Asklepieio General Hospital of Voula, Greece;

<sup>31</sup>1<sup>st</sup> Department of Internal Medicine, National and Kapodistrian University of Athens, Medical School, Athens, Greece;

<sup>32</sup>2<sup>nd</sup> Department of Propedeutic Medicine, Aristotle University of Thessaloniki, Medical School, Thessaloniki, Greece;

<sup>33</sup>2<sup>nd</sup> Department of Internal Medicine, Konstantopouleio General Hospital, Athens, Greece;

<sup>34</sup>Department of Pulmonary Medicine, General Hospital of Kerkyra, Greece;

<sup>35</sup>Department of Internal Medicine, Sotiria General Hospital of Chest Diseases, Greece;

<sup>36</sup>Department of Internal Medicine, University of Patras, Rion, Greece;

<sup>37</sup>1<sup>st</sup> Department of Internal Medicine, Thrasio General Hospital of Eleusis, Athens, Greece;

<sup>38</sup>2<sup>nd</sup> Department of Internal Medicine, Democritus University of Thrace, Medical School, 681 00 Alexandroupolis, Greece

<sup>39</sup>Department of Medicine and Research Laboratory of Internal Medicine, National Expertise Center of Greece in Autoimmune Liver Diseases, General University Hospital of Larissa, 41110 Larissa, Greece

<sup>40</sup>Department of Immunology and Metabolism, Life and Medical Sciences Institute, University of Bonn, Germany

**Supplementary Table 1.** Characteristics of patients participating in both cohorts. Related to Figure 1.

|                                                    | Discovery cohort (SAVE-MORE study) |                          |                      | Validation cohort I (SAVE study) |                           |                      | Validation cohort II (Dutch) |                             |                    |
|----------------------------------------------------|------------------------------------|--------------------------|----------------------|----------------------------------|---------------------------|----------------------|------------------------------|-----------------------------|--------------------|
|                                                    | suPAR <6ng/ml<br>(N=225)           | suPAR ≥6ng/ml<br>(N=390) | p-value              | suPAR <6ng/ml<br>(N=97)          | suPAR ≥6 ng/ml<br>(N=675) | p-value              | suPAR<br><6ng/ml<br>(N=25)   | suPAR<br>≥6ng/ml<br>(N=147) | p-value            |
| Male gender, n (%)                                 | 154 (68.4)                         | 257 (62.1)               | 0.119 <sup>a</sup>   | 57 (58.8)                        | 420 (62.2)                | 0.505 <sup>a</sup>   | 19 (76.1)                    | 96 (65.3)                   | 0.363 <sup>a</sup> |
| Age, years, mean (SD)                              | 53.2 (12.2)                        | 60.6 (12.3)              | <0.0001 <sup>b</sup> | 53.4 (10.2)                      | 61.9 (13.6)               | <0.0001 <sup>b</sup> | 64.2 (13.2)                  | 66.8 (12.2)                 | 0.330 <sup>b</sup> |
| BMI, kg/m <sup>2</sup> ,<br>mean (SD)              | 29.1 (5.0)                         | 29.5 (5.5)               | 0.365 <sup>b</sup>   | na                               | na                        |                      | 24.9 (4.6)                   | 29.2 (6.2)                  | 0.011 <sup>b</sup> |
| COVID-19 pneumonia<br>severity at enrolment, n (%) |                                    |                          |                      |                                  |                           |                      |                              |                             |                    |
| Moderate                                           | 55 (24.4)                          | 56 (13.5)                |                      | 23 (23.7)                        | 180 (23.3)                |                      | 12 (48.0)                    | 31 (21.2)                   |                    |
| Severe                                             | 170 (75.6)                         | 358 (86.5)               | 0.0007 <sup>a</sup>  | 74 (76.3)                        | 495 (64.1)                | 1.00 <sup>a</sup>    | 13 (52.0)                    | 115 (78.8)                  | 0.011 <sup>a</sup> |
| Dexamethasone treatment, n<br>(%)                  | 173 (76.9)                         | 357 (86.2)               | 0.004 <sup>a</sup>   | 74 (76.3)                        | 495 (64.1)                | 1.00 <sup>a</sup>    | 13 (52.0)                    | 115 (78.8)                  | 0.011 <sup>a</sup> |

<sup>a</sup>Fisher's exact test; <sup>b</sup>Student's t-test

Abbreviations BMI: body mass index; na: non-available; SD: standard deviation; suPAR: soluble urokinase-type plasminogen activator receptor; WHO: World Health Organization

**Supplementary Table 2 Distribution of the values of the SCOPE score according to the suPAR level in the discovery cohort** Related to Figure 3.

| <b>SCOPE score</b>         | <b>suPAR <math>\geq</math>6 ng/ml, (n)</b>                                          | <b>suPAR &lt;6 ng/ml, (n)</b>                                                       | <b>Total (n)*</b> |
|----------------------------|-------------------------------------------------------------------------------------|-------------------------------------------------------------------------------------|-------------------|
| <b><math>\geq 6</math></b> | 267<br>Sensitivity: 64.2%<br>(95%CI: 59.4-68.6)<br>PPV: 75.6%<br>(95%CI: 70.9-79.8) | 86                                                                                  | 353               |
| <b>&lt; 6</b>              | 149                                                                                 | 137<br>Specificity: 61.4%<br>(95%CI: 54.9-67.5)<br>NPV: 47.9%<br>(95%CI: 42.1-53.9) | 286               |
| <b>Total (n)</b>           | 416                                                                                 | 223                                                                                 | 639               |

\*The p-value of comparison of this 2 x 2 Table using the Fisher's exact test is <0.0001 demonstrating that patients with suPAR  $\geq$ 6 ng/ml are distributed towards greatest values of the SCOPE score.

Abbreviations CI: confidence intervals; n: number; NPV: negative predictive value; PPV: positive predictive value

**Supplementary Table 3 Distribution of the values of the SCOPE score according to the suPAR level in the validation cohort I Related to Figure 5.**

| <b>SCOPE score</b>         | <b>suPAR <math>\geq</math>6 ng/ml, (n)</b>                                              | <b>suPAR &lt;6 ng/ml, (n)</b>                                                          | <b>Total (n)*</b> |
|----------------------------|-----------------------------------------------------------------------------------------|----------------------------------------------------------------------------------------|-------------------|
| <b><math>\geq 6</math></b> | 491<br>Sensitivity: 72.7%<br>(95% CIs: 69.3-75.9)<br>PPV: 92.3%<br>(95% CIs: 89.7-94.3) | 41                                                                                     | 532               |
| <b>&lt;6</b>               | 184                                                                                     | 56<br>Specificity: 57.7%<br>(95% CIs: 47.8-67.1)<br>NPV: 23.3%<br>(95% CIs: 18.4-29.1) | 240               |
| <b>Total (n)</b>           | 675                                                                                     | 97                                                                                     | 772               |

\*The p-value of comparison of this 2 x 2 Table using the Fisher's exact test is <0.0001 demonstrating that patients with suPAR  $\geq$ 6 ng/ml are distributed towards greatest values of the SCOPE score.

Abbreviations n: number; NPV: negative predictive value; PPV: positive predictive value

**Supplementary Table 4 Distribution of the values of the SCOPE score according to the suPAR level in the validation cohort II** Related to Figure 6.

| <b>SCOPE score</b>         | <b>suPAR <math>\geq</math>6 ng/ml, (n)</b>                                              | <b>suPAR &lt;6 ng/ml, (n)</b>                                                         | <b>Total (n)*</b> |
|----------------------------|-----------------------------------------------------------------------------------------|---------------------------------------------------------------------------------------|-------------------|
| <b><math>\geq 6</math></b> | 140<br>Sensitivity: 95.2%<br>(95% CIs: 90.5-97.7)<br>PPV: 89.2%<br>(95% CIs: 83.3-93.1) | 17                                                                                    | 157               |
| <b>&lt;6</b>               | 7                                                                                       | 8<br>Specificity: 32.0%<br>(95% CIs: 17.2-51.6)<br>NPV: 53.3%<br>(95% CIs: 30.1-75.2) | 15                |
| <b>Total (n)</b>           | 147                                                                                     | 25                                                                                    | 172               |

\*The p-value of comparison of this 2 x 2 Table using the Fisher's exact test is <0.0001 demonstrating that patients with suPAR  $\geq$ 6 ng/ml are distributed towards greatest values of the SCOPE score.

Abbreviations n: number; NPV: negative predictive value; PPV: positive predictive value

A)

|              | SRF/death (+) (n)                      | SRF/death (-) (n)                       | Total |
|--------------|----------------------------------------|-----------------------------------------|-------|
| CRP >50 mg/l | 31<br>Sensitivity: 66.0%<br>PPV: 27.7% | 81                                      | 112   |
| CRP ≤50 mg/l | 16                                     | 174<br>Specificity: 68.2%<br>NPV: 91.6% | 190   |
| Total (n)    | 47                                     | 255                                     | 302   |

B)

|                    | SRF/death (+) (n)                     | SRF/death (-) (n)                       | Total |
|--------------------|---------------------------------------|-----------------------------------------|-------|
| D-dimers >1.2 mg/l | 8<br>Sensitivity: 17.0%<br>PPV: 32.3% | 29                                      | 37    |
| D-dimers ≤1.2 mg/l | 39                                    | 226<br>Specificity: 88.6%<br>NPV: 85.3% | 265   |
| Total (n)          | 47                                    | 255                                     | 302   |

C)

|                     | SRF/death (+) (n)                      | SRF/death (-) (n)                       | Total |
|---------------------|----------------------------------------|-----------------------------------------|-------|
| Ferritin >700 ng/ml | 24<br>Sensitivity: 51.1%<br>PPV: 30.8% | 54                                      | 78    |
| Ferritin ≤700 ng/ml | 23                                     | 201<br>Specificity: 78.8%<br>NPV: 89.7% | 224   |
| Total (n)           | 47                                     | 255                                     | 302   |

D)

|                | SRF/death (+) (n)                      | SRF/death (-) (n)                       | Total |
|----------------|----------------------------------------|-----------------------------------------|-------|
| IL-6 >24 pg/ml | 30<br>Sensitivity: 63.8%<br>PPV: 37.0% | 51                                      | 81    |
| IL-6 ≤24 pg/ml | 17                                     | 204<br>Specificity: 80.0%<br>NPV: 92.3% | 221   |
| Total (n)      | 47                                     | 255                                     | 302   |

**Supplementary Figure 1 Comparative performance of each of the four biomarkers to predict the progression into severe respiratory failure (SRF) or death the first 14 days.** Related to Figure 2.

At each of the four panels, the cut-off is coming from the analysis of the Youden index of the co-ordinate points of the receiver operator characteristics curve.

A) C-reactive protein (CRP); B) D-dimers; C) Ferritin; D) interleukin (IL)-6

Abbreviations n: number; NPV: negative predictive value; PPV: positive predictive value



A)

|                                  | SRF/death (+) (n)                      | SRF/death (-) (n)                       | Total |
|----------------------------------|----------------------------------------|-----------------------------------------|-------|
| CRP+D-dimers + ferritin $\geq 4$ | 33<br>Sensitivity: 70.2%<br>PPV: 26.8% | 90                                      | 123   |
| CRP+D-dimers + ferritin $< 4$    | 14                                     | 165<br>Specificity: 64.7%<br>NPV: 92.2% | 179   |
| Total (n)                        | 47                                     | 255                                     | 302   |

B)

|                              | SRF/death (+) (n)                      | SRF/death (-) (n)                       | Total |
|------------------------------|----------------------------------------|-----------------------------------------|-------|
| CRP+D-dimers + IL-6 $\geq 4$ | 38<br>Sensitivity: 80.9%<br>PPV: 28.1% | 97                                      | 135   |
| CRP+D-dimers + IL-6 $< 4$    | 9                                      | 158<br>Specificity: 62.0%<br>NPV: 94.6% | 167   |
| Total (n)                    | 47                                     | 255                                     | 302   |

C)

|                              | SRF/death (+) (n)                      | SRF/death (-) (n)                       | Total |
|------------------------------|----------------------------------------|-----------------------------------------|-------|
| CRP+ ferritin+ IL-6 $\geq 5$ | 32<br>Sensitivity: 68.1%<br>PPV: 37.6% | 53                                      | 85    |
| CRP+ ferritin+ IL-6 $< 5$    | 15                                     | 202<br>Specificity: 79.2%<br>NPV: 93.1% | 217   |
| Total (n)                    | 47                                     | 255                                     | 302   |

D)

|                                    | SRF/death (+) (n)                      | SRF/death (-) (n)                       | Total |
|------------------------------------|----------------------------------------|-----------------------------------------|-------|
| D-dimers + ferritin+ IL-6 $\geq 5$ | 33<br>Sensitivity: 70.2%<br>PPV: 37.1% | 56                                      | 89    |
| D-dimers + ferritin+ IL-6 $< 5$    | 14                                     | 199<br>Specificity: 78.0%<br>NPV: 93.4% | 213   |
| Total (n)                          | 47                                     | 255                                     | 302   |

**Supplementary Figure 2 N-1 analyses of components of the SCOPE score to predict the progression into severe respiratory failure (SRF) or death the first 14 days in the discovery cohort.** Related to Figure 2.

The quartiles of the measured concentrations of C-reactive protein, D-dimers, ferritin and interleukin (IL)-6 providing separate points were used to calculate four sub-scores. Sub-scores are (A) adding the points provided by CRP, D-dimers and ferritin; (B) adding the points provided by CRP, D-dimers and IL-6; (C) adding the points provided by CRP, ferritin and IL-6; and (D) adding the points provided by D-dimers, ferritin and IL-6. For each of the four sub-scores, the cut-off is coming from the analysis of the Youden index of the co-ordinate points of the receiver operator characteristics curve.

A) C-reactive protein (CRP); B) D-dimers; C) Ferritin; D) interleukin (IL)-6

Abbreviations n: number; NPV: negative predictive value; PPV: positive predictive value

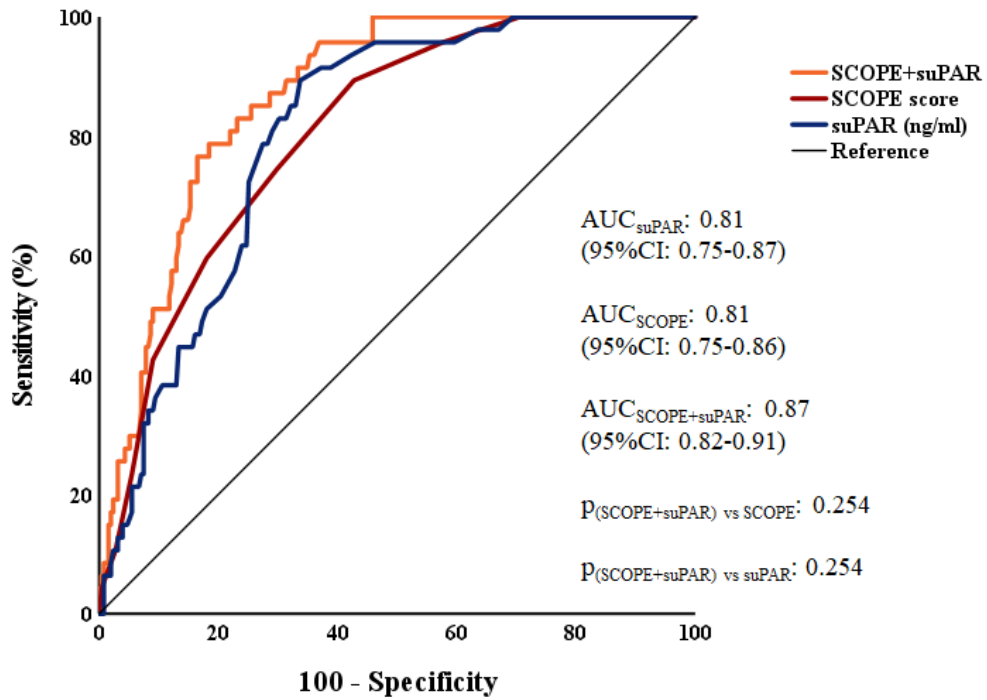

**Supplementary Figure 3 Comparative performance of suPAR, SCOPE score and their interaction for the prediction of progression into severe respiratory failure or death the first 14 days.** Related to Figure 2. Receiver Operator Characteristic (ROC) curves of the SCOPE score, of suPAR and of their interaction to predict the progression into SRF or death the first 14 days. The areas under the ROC curves (AUROC) and the 95% confidence intervals of the SCOPE score, of suPAR and of their interaction are provided. The p-values of comparisons of the AUROCs are also provided.

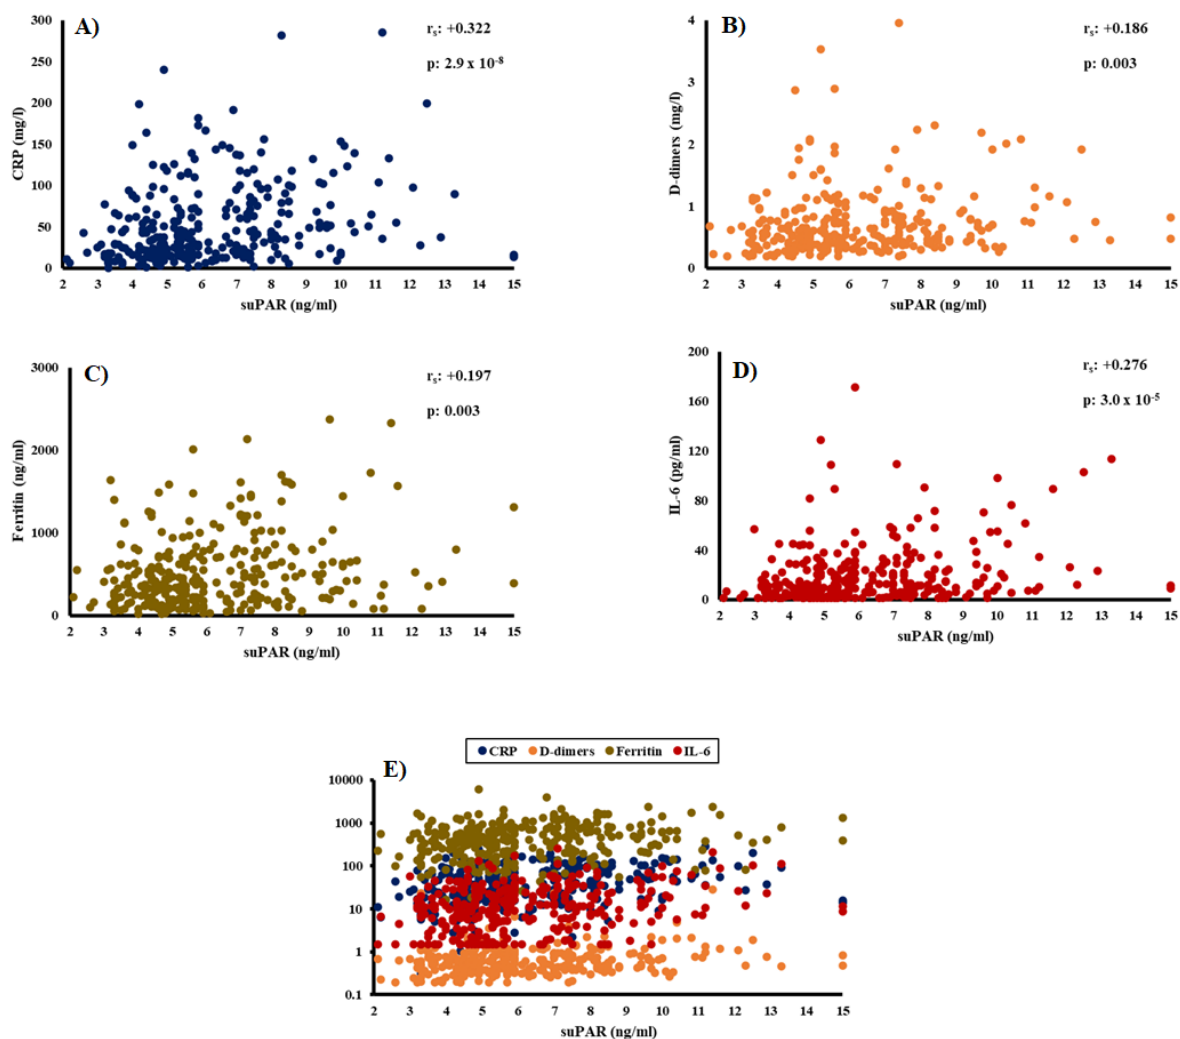

F)

|                    | Univariate analysis |         | Multivariate analysis |       |
|--------------------|---------------------|---------|-----------------------|-------|
|                    | OR (95% CIs)        | p       | OR (95% CIs)          | p     |
| CRP quartiles      | 1.58 (1.29-1.94)    | <0.0001 | 1.35 (1.08-1.69)      | 0.009 |
| D-dimers quartiles | 1.19 (0.97-1.46)    | 0.088   | *                     |       |
| Ferritin quartiles | 1.49 (1.21-1.84)    | <0.0001 | 1.34 (1.07-1.68)      | 0.011 |
| IL-6 quartiles     | 1.47 (1.18-1.83)    | 0.001   | 1.29 (1.02-1.64)      | 0.033 |

**Supplementary Figure 4** Lasso regression analysis of the selection of biomarkers for the SCOPE score in the discovery cohort Related to Figure 2.

Correlation of the values of soluble urokinase plasminogen activator receptor (suPAR) with those of A) C-reactive protein (CRP); B) D-dimers; C) ferritin; and D) interleukin (IL)-6. The Spearman ( $r_s$ ) rank of order correlations and the respective p-values are provided. P-values are corrected for multiple tests. The clustering of correlation between CRP, D-dimers, ferritin and IL-6 with suPAR is provided in panel E. The quartiles of CRP, D-dimers, ferritin and IL-6 have entered univariate and multivariate step-wise forward logistic regression analysis and results are shown in panel F. \*did not enter the equation after 3 steps of forward analysis

Abbreviations CI: confidence intervals; OR: odds ratio

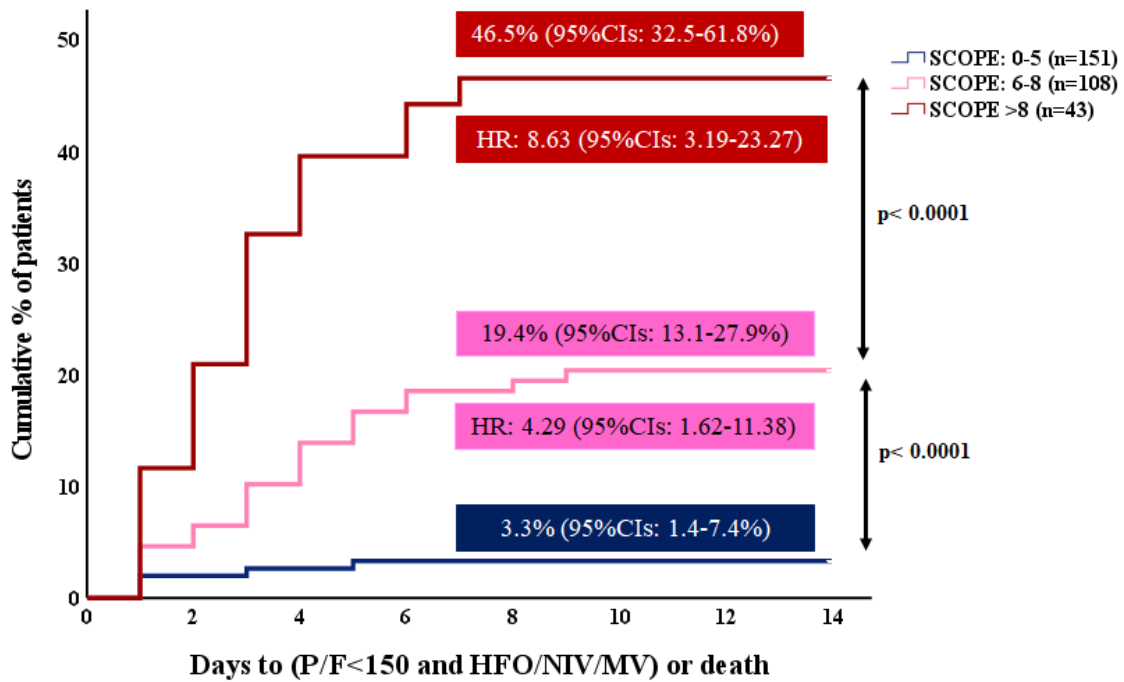

**Patients at risk (n)**

|           |     |     |     |     |     |     |     |     |
|-----------|-----|-----|-----|-----|-----|-----|-----|-----|
| SCOPE >8  | 43  | 34  | 26  | 24  | 23  | 23  | 23  | 23  |
| SCOPE 6-8 | 108 | 101 | 93  | 88  | 87  | 86  | 86  | 86  |
| SCOPE 0-5 | 151 | 148 | 147 | 146 | 146 | 146 | 146 | 146 |

**Supplementary Figure 5 Prognostic performance of different levels of the SCOPE score for severe respiratory failure (SRF) or death after 14 days Related to Figure 3.**

Time to progression into SRF or death the first 14 days when the SCORE score is ranging between 0 and 5; between 6 and 8; and more than 8. This analysis includes 302 patients for which the four biomarkers of the SCOPE score were measured and for which clinical information for 14-day outcome was available. The p-values of the indicated comparisons by arrows are provided.

Abbreviations CI: confidence intervals; HFO: high-flow oxygen; HR: hazard ratio; MV: mechanical ventilation; n: number of patients; NIV: non-invasive ventilation

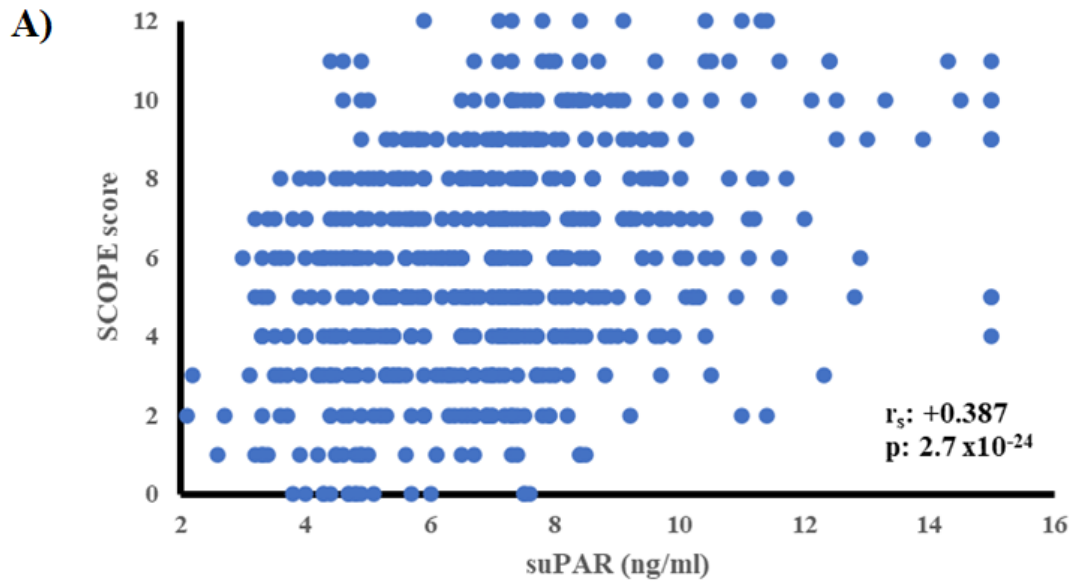

**B)**

| suPAR<br>(ng/ml) | SCOPE score (number of patients, %) |           |           |           |           |           |          |
|------------------|-------------------------------------|-----------|-----------|-----------|-----------|-----------|----------|
|                  | 6                                   | 7         | 8         | 9         | 10        | 11        | 12       |
| <2-3.9           | 5 (6.0)                             | 4 (5.3)   | 2 (3.0)   | 0 (0)     | 0 (0)     | 0 (0)     | 0 (0)    |
| 4.0-4.9          | 15 (17.9)                           | 9 (12.0)  | 6 (9.0)   | 1 (2.0)   | 2 (4.9)   | 3 (12.5)  | 0 (0)    |
| 5.0-5.9          | 8 (9.5)                             | 9 (12.0)  | 12 (17.9) | 8 (16.0)  | 1 (2.4)   | 0 (0)     | 1 (8.3)  |
| 6.0-7.0          | 16 (19.0)                           | 12 (16.0) | 15 (22.4) | 10 (20.0) | 4 (9.8)   | 1 (4.2)   | 0 (0)    |
| 7.1-8.0          | 17 (20.2)                           | 17 (22.7) | 12 (17.9) | 15 (30.0) | 7 (17.1)  | 5 (20.8)  | 4 (33.3) |
| 8.1-9.0          | 11 (13.1)                           | 7 (9.3)   | 6 (9.0)   | 4 (8.0)   | 14 (34.1) | 3 (12.5)  | 1 (8.3)  |
| >9.0             | 12 (14.3)                           | 17 (22.7) | 14 (20.8) | 12 (24.0) | 13 (31.7) | 22 (50.0) | 6 (50.0) |

$r_s: +0.305; p: 4.7 \times 10^{-9}$

**C)**

| <4 ng/ml | 4.0-5.9 ng/ml | $\geq 6$ ng/ml |
|----------|---------------|----------------|
| 3.1%     | 22.3%         | 75.6%          |

**Supplementary Figure 6. Correlation between SCOPE score and suPAR Related to Figure 3.**

A) Scatterplot demonstrating the correlation between suPAR and SCOPE score (n=639; all analyzed patients)

B) Heat map of suPAR concentration versus SCOPE score (n=353 patients with SCOPE score  $\geq 6$ )

(C) and distribution with SCOPE  $\geq 6$  (n=353) into three main categories of suPAR (normal [ $<4.0$  ng/ml]; intermediate [ $4.0$ – $<6.0$  ng/ml] and high [ $\geq 6.0$  ng/ml]).

**Abbreviations**  $r_s$ , Spearman's correlation coefficient; SCOPE, Severe COvid Prediction Estimate; suPAR, suPAR, soluble urokinase-type plasminogen activator receptor.

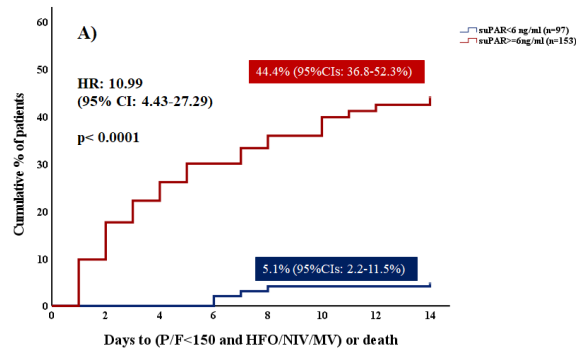

|                 | 0   | 2   | 4   | 6   | 8  | 10 | 12 | 14 |
|-----------------|-----|-----|-----|-----|----|----|----|----|
| suPAR ≥ 6 ng/ml | 153 | 125 | 112 | 106 | 97 | 91 | 87 | 85 |
| suPAR < 6 ng/ml | 97  | 97  | 97  | 95  | 93 | 93 | 93 | 92 |

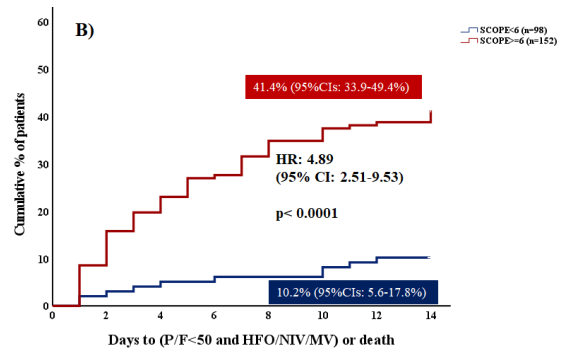

|           | 0   | 2   | 4   | 6   | 8  | 10 | 12 | 14 |
|-----------|-----|-----|-----|-----|----|----|----|----|
| SCOPE ≥ 6 | 152 | 128 | 117 | 110 | 99 | 95 | 93 | 89 |
| SCOPE < 6 | 98  | 95  | 93  | 92  | 92 | 90 | 88 | 88 |

**Supplementary Figure 7 Prognostic performance of suPAR and SCOPE score for progression into severe respiratory failure (SRF) or death the first 14 days in the validation cohort** Related to Figure 5.

The analysis includes patients screened for eligibility for the SAVE trial. All the patients have similar baseline characteristics to the patients enrolled in the SAVE-MORE trial. More precisely, patients had WHO-CPS 4 or 5 and they received the same SoC treatment.

A) Time to progression into SRF or for death the first 14 days between patients with suPAR 6 ng/ml or more and patients with suPAR less than 6 ng/ml.

B) Time to progression into SRF or for death the first 14 days between patients with SCOPE score 6 or more and patients with SCOPE score less than 6.

Abbreviations CI: confidence intervals; HFO: high-flow oxygen; HR: hazard ratio; MV: mechanical ventilation; n: number of patients; NIV: non-invasive ventilation; suPAR: soluble urokinase plasminogen activator receptor

A)

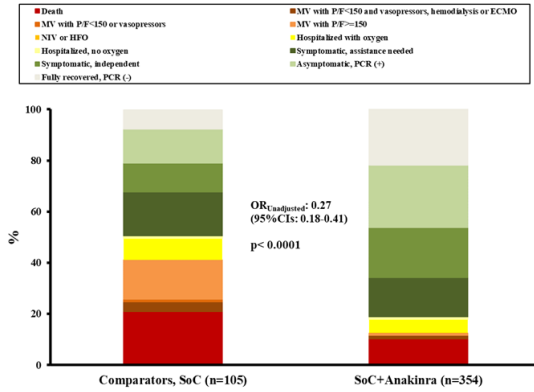

B)

| Variable                                  | Univariate analysis |         | Multivariate analysis |         |
|-------------------------------------------|---------------------|---------|-----------------------|---------|
|                                           | OR<br>(95% CIs)     | p-value | OR<br>(95% CIs)       | p-value |
| Group of treatment (anakinra vs placebo)  | 0.27<br>(0.18-0.41) | <0.0001 | 0.29<br>(0.19-0.43)   | <0.0001 |
| Dexamethasone intake (Yes/No)             | 1.64<br>(1.10-2.46) | 0.015   | 1.31<br>(0.87-1.98)   | 0.189   |
| Severe COVID-19 pneumonia by WHO (Yes/No) | 1.64<br>(1.10-2.46) | 0.015   | 1.31<br>(0.87-1.98)   | 0.189   |

**Supplementary Figure 8. Response to anakinra treatment of patients enrolled in the SAVE trial with SCOPE score 6 or more in the validation cohort I** Related to Figure 5.

A) Distribution of the World Health Organization (WHO) Clinical Progression Scale (CPS) at day 28 of patients allocated to treatment with standard-of-care (SoC) and placebo and to treatment with SoC and anakinra. The odds ratio (OR) of the unadjusted ordinal regression analysis and the 95% confidence intervals (CIs) are shown.

B) Univariate and multivariate ordinal regression analysis of the WHO-CPS at day 28.

Abbreviations CI: confidence interval; ECMO: extracorporeal membrane oxygenation; HFO: high flow oxygen; MV: mechanical ventilation; NIV: non-invasive ventilation; OR: odds ratio; PCR: polymerase chain reaction; P/F: respiratory failure; SoC; standard-of-care
